# Supplementary material for: G9a inactivation in progenitor cells with Isl1-Cre with reduced recombinase activity models aspects of Dandy-Walker complex
Source: PubMed Central journal article supplement (PMC10399207; doi:10.1242/bio.059894), 2023-07-28
Supplement: biolopen-12-059894-s1.pdf [file biolopen-12-059894-s1.pdf]

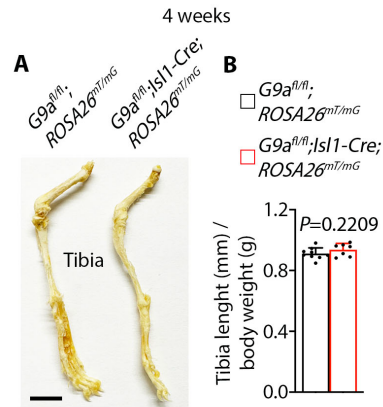

**Fig. S1. Hind limb skeleton is normal in *G9a* mutants.** (A) Hind limb skeleton of control ( $G9a^{fl/fl}; ROSA26^{mT/mG}$ ) and *G9a* mutant ( $G9a^{fl/fl}; Isl1-Cre; ROSA26^{mT/mG}$ ) mice at 4 weeks of age. (A) Tibia length to body weight ratio of control and mutant mice. Bars represent the mean  $\pm$  s.d. of 8 mice per genotype. Data was analyzed by paired two-tailed Student's t-test.

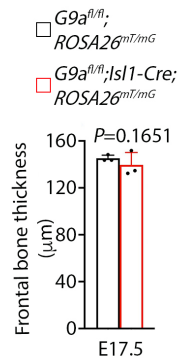

**Fig. S2. Frontal bone thickness is normal in *G9a* mutants.** Thickness of the frontal bone of control ( $G9a^{fl/fl}; ROSA26^{mT/mG}$ ) and *G9a* mutant ( $G9a^{fl/fl}; Isl1-Cre; ROSA26^{mT/mG}$ ) E17.5 embryos. Bars represent the mean  $\pm$  s.d. of 3 mice per genotype. Data was analyzed by paired two-tailed Student's t-test.

### Table S1. Volume in square micrometers of different embryonic regions measured from microcomputed tomography

[Click here to download Table S1](#)

### Table S2. Primers

Primers used for genotyping the *G9a* “floxed” allele and the *Isl1tm1(cre)* transgenic line.

| Target Gene                        | Forward                  | Reverse                   | Product length |
|------------------------------------|--------------------------|---------------------------|----------------|
| <i>G9a</i>                         | CACGCTGCCTAGATGGAGCATGCC | GTGTGAGCCTGTGTTCTGGGGATTA |                |
| WT allele: 368/ Floxed allele: 504 |                          |                           |                |
| <i>Isl1tm1(cre)</i>                | GCCACTATTTGCCACCTAGC     | AGGCAAATTTTGGTGTACGG      | 250            |

Primers for qPCR.

| Target Gene   | Forward                   | Reverse                 | Product length |
|---------------|---------------------------|-------------------------|----------------|
| <i>Foxc1</i>  | CAACATCATGACGTCGCTGC      | CCCGGAGAGTAGGCACCCA     | 135            |
| <i>Zic1</i>   | CCGGCTGAGGAGCCTTGAT       | AGGCAAGAGAGATGACTGCCG   | 134            |
| <i>Zic4</i>   | GGCCCAGTGGGACATTGA        | GGTCATTTCCGGAGGTGGTGAAG | 89             |
| <i>Mpdz</i>   | ACCAGCATATTACCGATTGAAGAAG | TGCTCACATGAGCCACCACTA   | 151            |
| <i>Fgf8</i>   | GCTCATTGTGGAGACCGATACTT   | TGGCAATTAGCTTCCCCTTCT   | 101            |
| <i>Lamc1</i>  | CTGCCGCAAATGTGTCAATC      | GCTTCTTCTGCCAAGAGGGT    | 76             |
| <i>Foxl2</i>  | GCTTACCTCTTGGCCCTCTC      | CGCTTCTAGTCGCAGACAGT    | 90             |
| <i>Cip2a</i>  | GATTCCACCGCCTGCTTGAA      | AGCTTTTGTCCAGAACTACCTCC | 119            |
| <i>Fgf17</i>  | GGCTTCTCTGGGACTCTACCTC    | CGGGTGATTCTCCCCCTGTGTT  | 180            |
| <i>Rpl13a</i> | TCCCTCCACCCTATGACAAG      | GTCCTGCCTGGTACTTCC      | 136            |

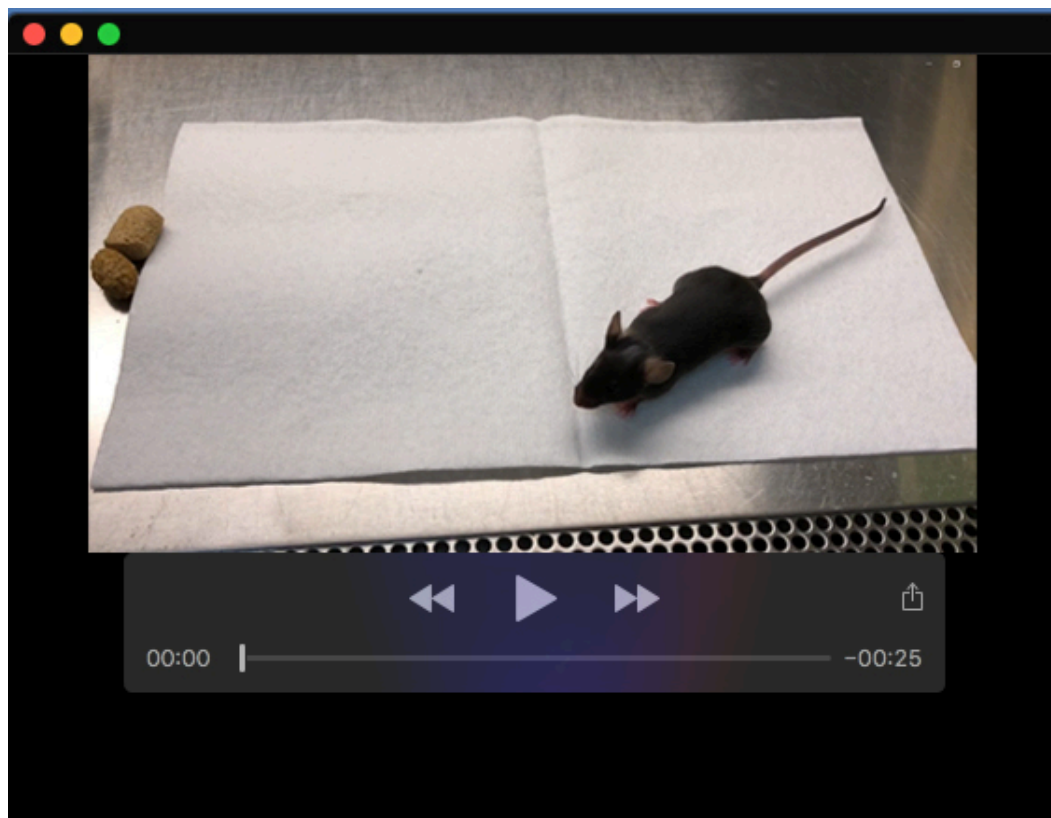

**Movie 1. Control  $G9a^{fl/fl};ROSA26^{mT/mG}$  mouse walking.**

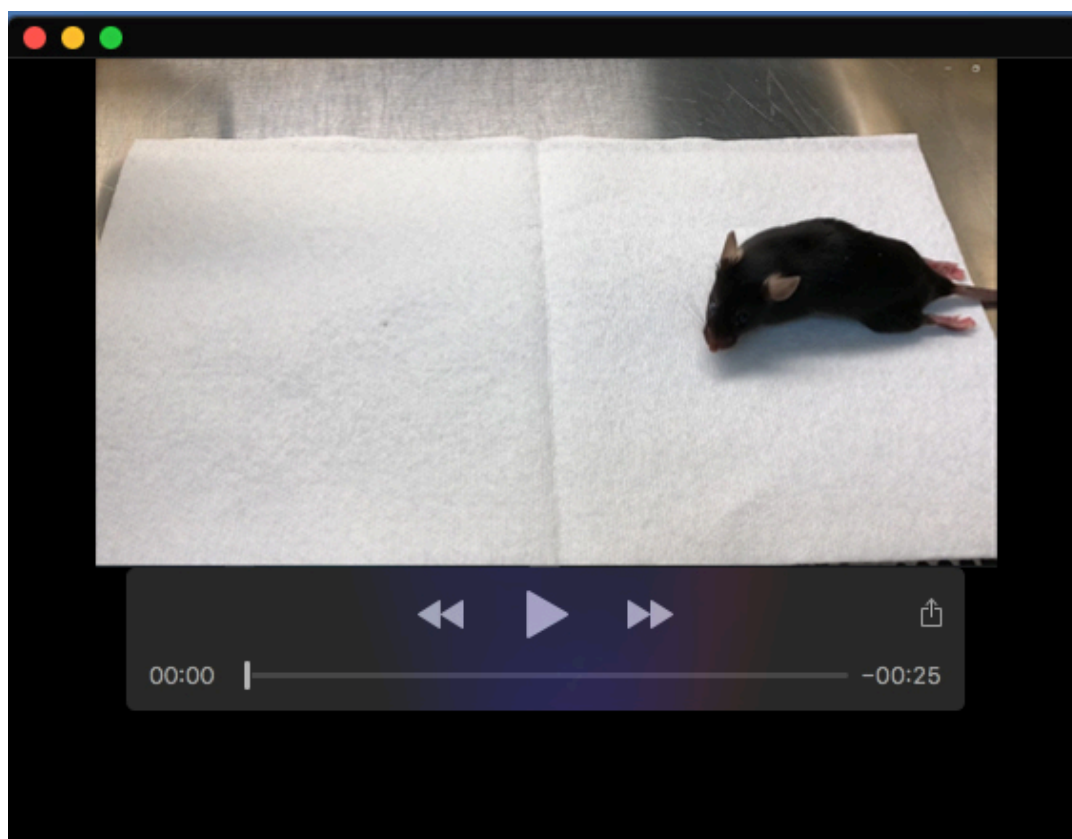

**Movie 2. G9a mutant  $G9a^{fl/fl};Isl1-Cre;ROSA26^{mT/mG}$  mouse walking.**
